# Supplementary material for: Study protocol: Development and evaluation of an Interpersonal Counseling-based Stratified Stepped-Care intervention for suicide prevention among children and adolescents. A Randomized Controlled Trial
Source: Research Square preprint supplement (doi:10.21203/rs.3.rs-8050902/v1), 2026-02-16
Supplement: Supplementary file 1 [file d9669fc6c5e0b88dc1fd7ca0.docx]

**Additional file 3: Consent and Assent Forms.**

Model forms for written informed consent (parents) and assent (youth aged 16–18), including detailed information regarding participation, risk management, and confidentiality protocols.
