# Supplementary material for: Study protocol: Development and evaluation of an Interpersonal Counseling-based Stratified Stepped-Care intervention for suicide prevention among children and adolescents. A Randomized Controlled Trial
Source: Research Square preprint supplement (doi:10.21203/rs.3.rs-8050902/v1), 2026-02-16
Supplement: Supplementary file 2 [file f65a330ebf2a50fdc5d75bbb.docx]

**SPIRIT Checklist for Study Protocol:** Development and evaluation of an Interpersonal Counseling-based Stratified Stepped-Care intervention for suicide prevention among children and adolescents- A Randomized Controlled Trial.

| **Item No.** | **SPIRIT Item** | **Description** | **Location in Manuscript or Comment** |
| --- | --- | --- | --- |
| **Administrative Information** |  |  |  |
| 1 | Title | Descriptive title identifying the study design, population, interventions, and, if applicable, trial acronym. | Title page: Study protocol: Development and evaluation of an Interpersonal Counseling-based Stratified Stepped-Care intervention for suicide prevention among children and adolescents- A Randomized Controlled Trial. |
| 2 | Trial registration | Trial identifier and registry name. If not registered, state reason. | Section: *Trial Registration* (second page ): The study is submitted for registration with ClinicalTrials.gov (Submission ID: 0021-24-RMC). The full details will be updated upon final approval |
| 3 | Protocol version | Date and version identifier. | Protocol version 1.0, August 2024. [ supplementary files #1) |
| 4 | Funding | Sources and types of financial, material, and other support. | Section: *Funding* (page 23): This research is supported by a grant from The Israel national institute for health policy research (grant number 2023/333) |
| 5 | Roles and responsibilities | Names, affiliations, and roles of protocol contributors, sponsor, and funders. | *See Funding* (page 23) See authors’ contributions, (page 25) |
| **Introduction** |  |  |  |
| 6a | Background and rationale | Explanation of the scientific background and rationale for the trial. | Section: *Introduction* (pages 3-10): Describes suicide prevalence, service gaps, and rationale for SSC model. |
| 6b | Objectives | Specific objectives or hypotheses. | Section: *Objectives* (page 10): Lists three objectives (develop guidelines, test efficacy, evaluate implementation). |
| 7 | Trial design | Description of trial design, including type (e.g., randomized, factorial), allocation ratio, and framework (e.g., superiority). | Section: *Methods* (page 11): Describes study design (RCT), 1:1 allocation, superiority framework. |
| **Methods: Participants, Interventions, and Outcomes** |  |  |  |
| 8 | Study setting | Description of study settings (e.g., community clinic, hospital). | Section: Sample and Recruitment (page 11): Conducted at Schneider Children’s Medical Center, Israel. |
| 9 | Eligibility criteria | Inclusion and exclusion criteria for participants. | Section: *Sample* (page 11): Lists inclusion (ages 6–18, STB) and exclusion criteria (e.g., psychotic disorders, non-fluency in Hebrew). |
| 10 | Interventions | Description of interventions, including delivery, duration, and adherence strategies. | Section: *Interventions* (pages 13-16): Describes SSC (Step 1: IPC-A-SCI, Step 2: IPT-A-SCI) and CAU. Table 1 details IPC-A-SCI modules. |
| 11a | Criteria for discontinuing or modifying interventions | Criteria for discontinuing or modifying allocated interventions for a given participant. | Section: *Interventions* (page 13): Progression from Step 1 to Step 2 based on C-SSRS/CGI scores. |
| 11b | Strategies to improve adherence | Strategies to improve adherence to intervention protocols and monitoring procedures. | Section: *Methods* pages 14-15 (Supplementary File1 & 2). |
| 11c | Relevant concomitant care | Relevant concomitant care and interventions permitted or prohibited during the trial. | Intervention protocol (page 13) Participants may continue existing non-psychotherapeutic treatments, but new psychotherapy is prohibited during the trial. |
| 12 | Outcomes | Primary, secondary, and other outcomes, including specific measurement variables and time points. | Section: *Assessments* (page 16): Primary outcome (C-SSRS), secondary outcomes (MFQ, SCARED, etc.), policy metrics. Table 2 details time points. |
| 13 | Participant timeline | Time schedule of enrolment, interventions, assessments, and visits for participants. | Section: *Assessments* and Table 2 (page 17): Timeline includes baseline, mid post intervention and follow up after 3 months |
| 14 | Sample size | Estimated number of participants, including rationale and power calculations. | Section: *Statistical Analysis* (page 19): 350 participants, 80% power, α=0.05, medium effect size (d=0.36). |
| 15 | Recruitment | Strategies for achieving adequate participant enrolment. | Section: *Sample* (page 11): Recruitment from ERs and self-referrals to Schneider’s clinic over 3 years. |
| **Methods: Assignment of Interventions** |  |  |  |
| 16a | Allocation: Sequence generation | Method of generating the allocation sequence (e.g., random number table). | Section: *Randomization* (page 11): Stratified randomization by age, sex, and past SA. |
| 16b | Allocation: Concealment mechanism | Mechanism to conceal the allocation sequence (e.g., sealed envelopes). | online web service will be used to generate the random sequence and assign participants to one of the two study arms. This online system ensures that the allocation sequence is concealed from the research team, as the assignments are not known in advance (page 11) |
| 16c | Allocation: Implementation | Who will generate the allocation sequence, enroll participants, and assign interventions. | Section: *Randomization* (p 11 ) |
| 17a | Blinding: Who will be blinded | Who will be blinded (e.g., participants, assessors) and how. | Section: *Randomization* (page 11): blinding of participants providers and assessors is not feasible |
| 17b | Blinding: Unblinding procedures | Circumstances under which unblinding is permissible and procedure for revealing allocation. | Section: *Randomization* (page 11): blinding of participants and providers is not feasible |
| **Methods: Data Collection, Management, and Analysis** |  |  |  |
| 18a | Data collection methods | Plans for assessment, collection, and retention of outcome data. | Section: *Assessments* and Supplementary File 2 (pages 16–17): Describes validated questionnaires (C-SSRS, MFQ, etc.) and data collection at multiple time points. |
| 18b | Data collection: Retention | Plans to promote participant retention and complete follow-up. | Section: methods- data collection (page 19) |
| 19 | Data management | Plans for data entry, coding, security, and storage. | Section: *Ethical Considerations* (page 24-25): Data stored securely with unique codes. |
| 20a | Statistical methods: Outcomes | Statistical methods for analyzing primary and secondary outcomes. | Section: *Statistical Analysis* (page 19-20): Logistic regression for binary outcomes, random effects linear regression for continuous outcomes. |
| 20b | Statistical methods: Additional analyses | Methods for additional analyses (e.g., subgroup, adjusted analyses). | Section: *Statistical Analysis* (page 20 ): Exploratory analyses for cost-effectiveness and mediation effects (H3). |
| 20c | Statistical methods: Interim analyses | Definition of interim analyses and stopping guidelines. | Section: *Statistical Analysis* |
| 21a | Data monitoring | Composition of data monitoring committee (DMC) or rationale for not needing one. | Section: *Ethical Considerations*, Oversight and Safety Monitoring (page 21): The trial will utilize an internal Study Oversight and Safety Committee (SOSC) due to the low-risk psychosocial nature of the intervention, with the SOSC meeting every 6 months to review cumulative safety data. |
| 21b | Interim analyses and stopping guidelines | Description of interim analyses and stopping rules. | Section: *Statistical*  *Analyse*s and Stopping Rules (page 20): No formal efficacy analyses will be performed. The SOSC will conduct safety reviews every six months. Stopping rules are based on safety concerns (SAE rate) and futility. |
| 22 | Harms | Plans for collecting, assessing, and reporting adverse events and harms. | Section: *Ethical Considerations* (page 21): Safety protocols for high-risk cases and mandatory reporting for abuse. |
| 23 | Auditing | Frequency and procedures for auditing trial conduct. | Section: *Ethical Considerations* (page 21): Auditing is internal (SOSC, semi-annually) and external (Helsinki Committee, annually), verifying source documentation, consent process, and protocol adherence. |
| **Ethics and Dissemination** |  |  |  |
| 24 | Ethics approval | Plans for seeking research ethics approval. | Section: *Ethical Considerations* (page 21): Approved by Schneider’s Helsinki Committee (0021-24-RMC) and Haifa University Ethics Board. |
| 25 | Protocol amendments | Plans for communicating protocol modifications to relevant parties. | Section: *Ethical Considerations* (page 21): Protocol amendments will be submitted to IRBs and updated in the trial registry, if applicable. |
| 26a | Consent or assent | Who will obtain informed consent or assent and how. | Section: *Ethical Considerations* (page 20): Informed consent/assent obtained from participants/parents. |
| 26b | Ancillary studies | Additional consent provisions for collection and use of participant data in ancillary studies. | No ancillary studies planned. |
| 27 | Confidentiality | How personal information will be protected. | Section: *Ethical Considerations* (page 20): Data stored securely with unique codes. |
| 28 | Declaration of interests | Financial and other competing interests for principal investigators. | Section: *Competing Interests* (page 25): "The authors declare no competing interests." |
| 29 | Access to data | Statement of who will have access to the final trial dataset. | Section: *Availability of Data and Materials* (page 25): "Datasets available from the corresponding author upon reasonable request, subject to ethical approval." |
| 30 | Ancillary and post-trial care | Provisions for post-trial care or compensation for trial-related harms. | Section: *Ethical Considerations* (page 20-21) Participants requiring further care will be referred to appropriate services post-trial |
| 31a | Dissemination policy: Trial results | Plans for disseminating trial results to participants, healthcare professionals, and the public. | Section: *Dissemination* (page 26): Results to be published in journals, presented at conferences, and shared with policymakers. |
| 31b | Dissemination policy: Authorship | Authorship eligibility guidelines. | Section: *Dissemination* (page 26 ): Authorship based on ICMJE criteria. |
| 31c | Dissemination policy: Data sharing | Plans for sharing trial data. | Section: *Availability of Data and Materials* (page 25): Data available upon request. |
| 32 | Appendices: Informed consent materials | Model consent form and other related documentation. | Section: Supplementary Files |

**References**

Chan AW, Tetzlaff JM, Altman DG, et al. SPIRIT 2013 Statement: Defining Standard Protocol Items for Clinical Trials. *Annals of Internal Medicine*. 2013;158(3):200–207.
